# Supplementary material
Source: publisher site journal article supplement (https://www.dovepress.com/article/468705)
Supplement: Supplementary file 1 [file get_supplementary_file.php]

**Supplementary Material**

**Supplementary Figure 1**. Questionnaires sent to GPs based on the outcome of the liver health check

| **Questionnaire 1** – Sent to GP of participants with ‘low risk of clinically significant fibrosis’ (L) or ‘low risk with abnormal liver enzymes’ (LA) |
| --- |
| Please tick the response that most applies to you.  1- Did you find the letter recommendations helpful? ⃝ Not at all ⃝ A little ⃝ Some ⃝ A lot  2- Did the letter provide useful guidance about:  Investigation of NAFLD ⃝ Not at all ⃝ A little ⃝ Some ⃝ A lot  Investigation of abnormal liver enzymes * ⃝ Not at all ⃝ A little ⃝ Some ⃝ A lot  How to monitor for progression of NAFLD ⃝ Not at all ⃝ A little ⃝ Some ⃝ A lot  3- Lifestyle modification with increased physical activity and weight management is an important aspect of management of NAFLD and type 2 diabetes. Did the letter help to guide or prompt you to refer the patient to:  A dietician ⃝ Not at all ⃝ A little ⃝ Some ⃝ A lot  An exercise physiologist ⃝ Not at all ⃝ A little ⃝ Some ⃝ A lot  A psychologist ⃝ Not at all ⃝ A little ⃝ Some ⃝ A lot  4- How can our letters be improved?  5- What additional information would be helpful/useful? |
| **Questionnaire 2** – Sent to GP of participants with ‘increased risk of clinically significant fibrosis (H) |
| Please tick the response that most applies to your patient.  Patient has been referred to Hepatology  ⃝ Yes If Yes, patient was referred to:  ⃝ Hepatology clinic at Public hospital  ⃝ Another provider  ⃝ No If No, what were the reasons for not referring patient to Hepatology.  ⃝ Patient has not returned to see me to discuss the result  ⃝ I didn’t receive a letter from the study  ⃝ Patient does not want a referral  ⃝ I don’t think a referral is necessary or appropriate  ⃝ A referral is still being arranged  ⃝ Other reason (please describe) |

Note: There was a comment box (open ended question) under each of the questions above, so GPs could elaborate on their response; * This item was only added to the questionnaire if participant had abnormal liver enzymes
